# Supplementary material
Source: publisher figshare collection journal article supplement (https://acs.figshare.com/ndownloader/files/7552999)
Supplement: Supplementary file 1 [file 7552999]

## Supporting Information

### **Bifunctional Imidazolium-Based Ionic Liquid Decorated UiO-67 Type MOF for Selective CO<sub>2</sub> Adsorption and Catalytic Property for CO<sub>2</sub> Cycloaddition with Epoxides**

Luo-Gang Ding, Bing-Jian Yao,\* Wei-Ling Jiang, Jiang-Tao Li, Qi-Juan Fu, Yan-An Li, Zhen-Hua Liu, Jian-Ping Ma, Yu-Bin Dong\*

College of Chemistry, Chemical Engineering and Materials Science, Collaborative Innovation Center of Functionalized Probes for Chemical Imaging in Universities of Shandong, Key Laboratory of Molecular and Nano Probes, Ministry of Education, Shandong Normal University, Jinan 250014, P. R. China. E-mail: yubindong@sdsu.edu.cn, yaobingjian1986@163.com

#### **Content**

|                                                                                                     |            |
|-----------------------------------------------------------------------------------------------------|------------|
| <b>1. Calculation of <math>Q_{st}</math> by the Virial Method.....</b>                              | <b>S2</b>  |
| <b>2. Characterization of Ligand L.....</b>                                                         | <b>S2</b>  |
| <b>3. The <math>^1\text{H}</math> NMR Spectra for Catalytic CO<sub>2</sub> Cyclic Addition.....</b> | <b>S9</b>  |
| <b>4. References.....</b>                                                                           | <b>S10</b> |

## 1. Calculation of $Q_{st}$ and by the Virial Method<sup>1</sup>

*Heat of adsorption.* To calculate heats of adsorptions, the corresponding adsorption isotherms at two different temperatures (273 K / 293 K for CO<sub>2</sub>) were simultaneously fitted using the virial type,

Equation 1:

$$\ln P = \ln N + \frac{1}{T} \sum_{i=0}^m a_i N^i + \sum_{i=0}^n b_i N^i \quad (1)$$

The heat of adsorption at zero coverage was calculated from Equation 2, where as a function of surface coverage, from Equation 3:

$$Q_{st} = -R a_0 \quad (2)$$

$$Q_{st}(N) = -R \sum_{i=0}^m a_i N^i \quad (3)$$

## 2. Characterization of Ligand L

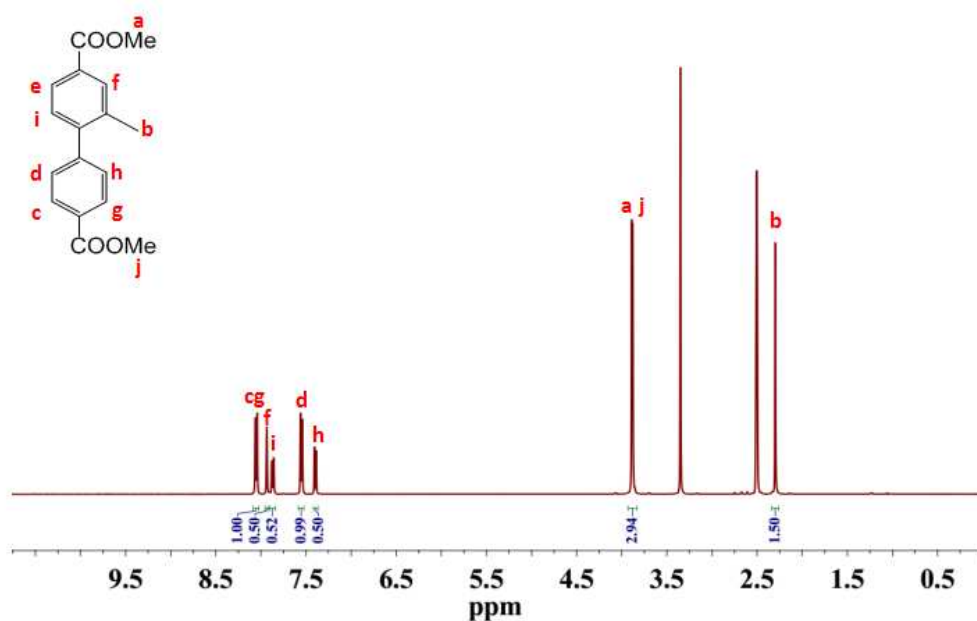

Figure S1. The <sup>1</sup>H-NMR spectrum of intermediate A.

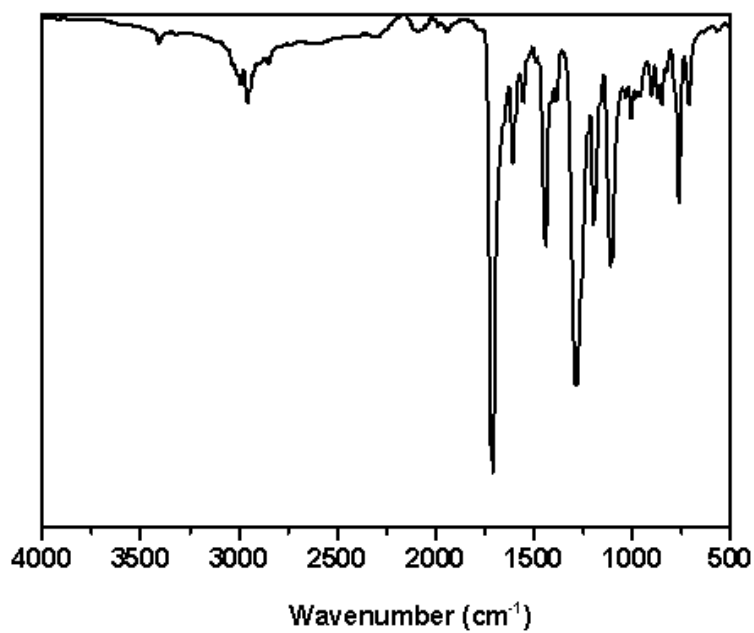

**Figure S2.** FTIR spectrum for intermediate A.

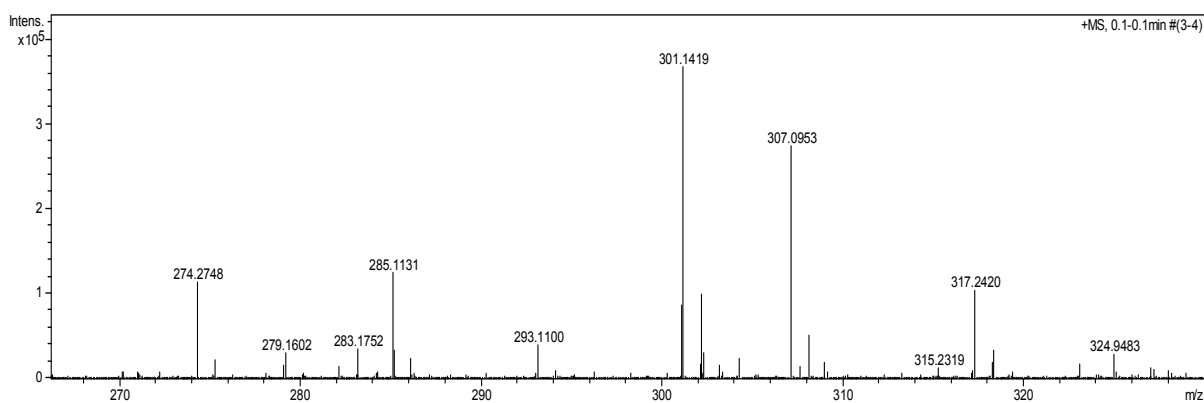

**Figure S3.** The mass spectrum (MS) of intermediate A.

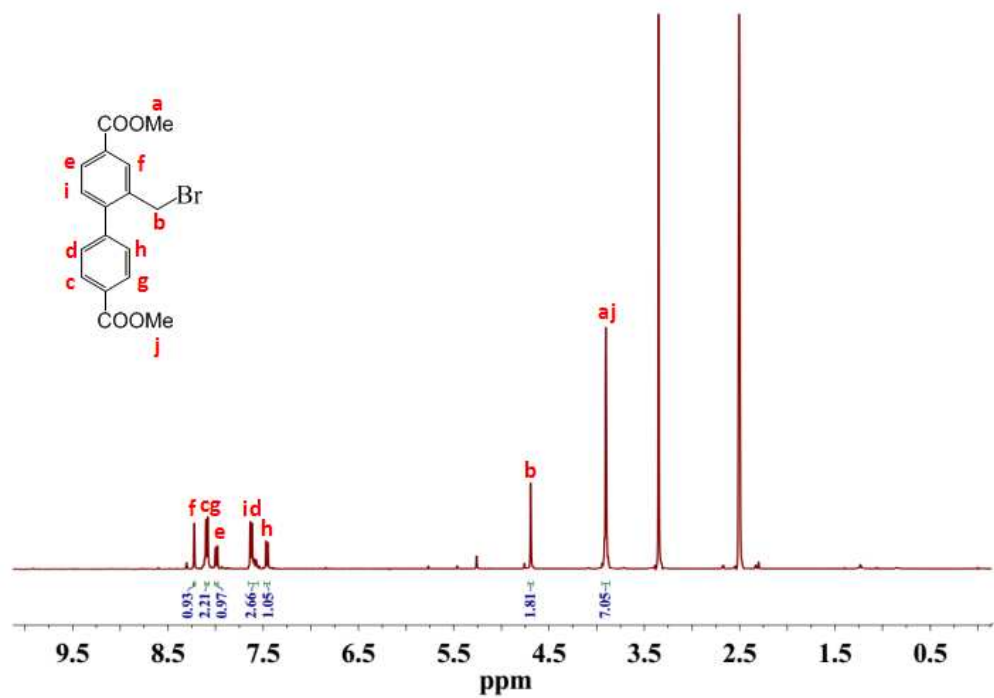

Figure S4. The  $^1\text{H}$ -NMR spectrum of intermediate B.

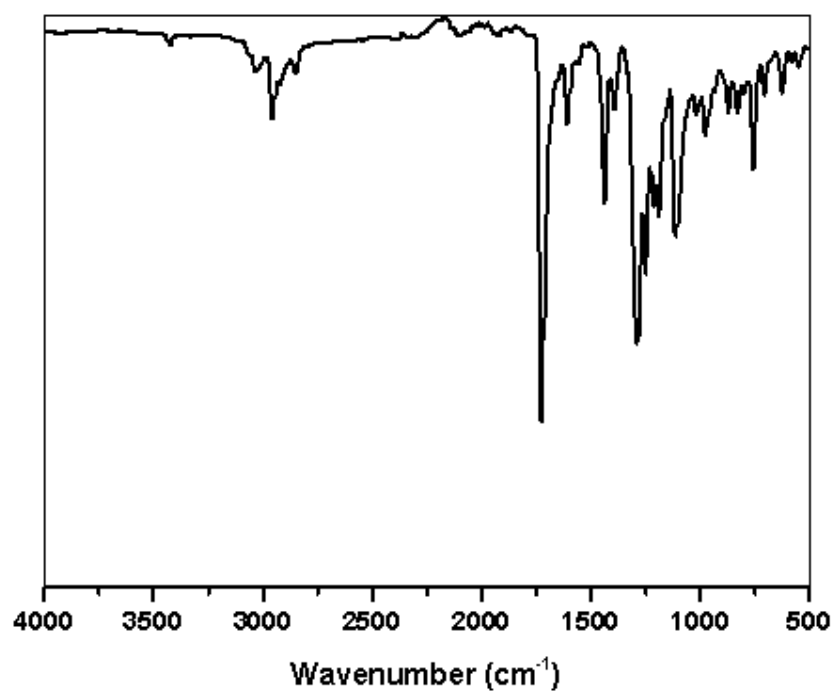

Figure S5. FTIR spectrum for intermediate B.

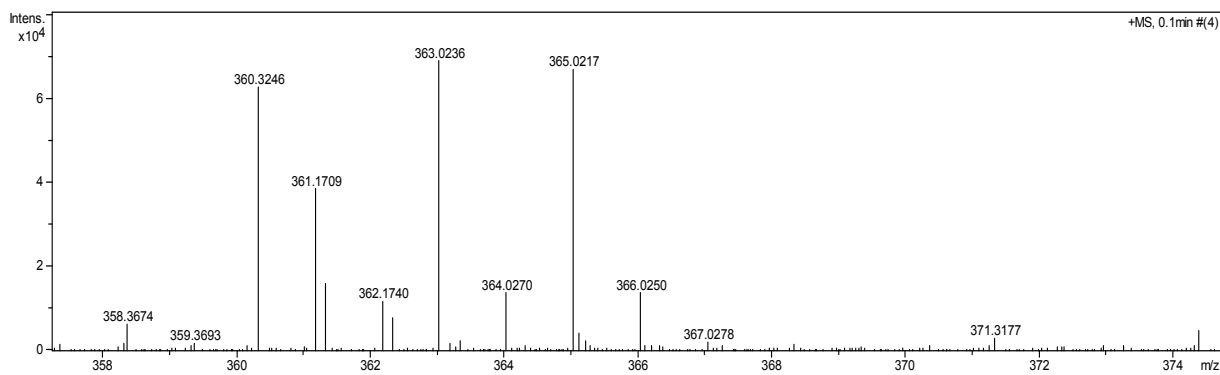

**Figure S6.** The mass spectrum (MS) of intermediate **B**.

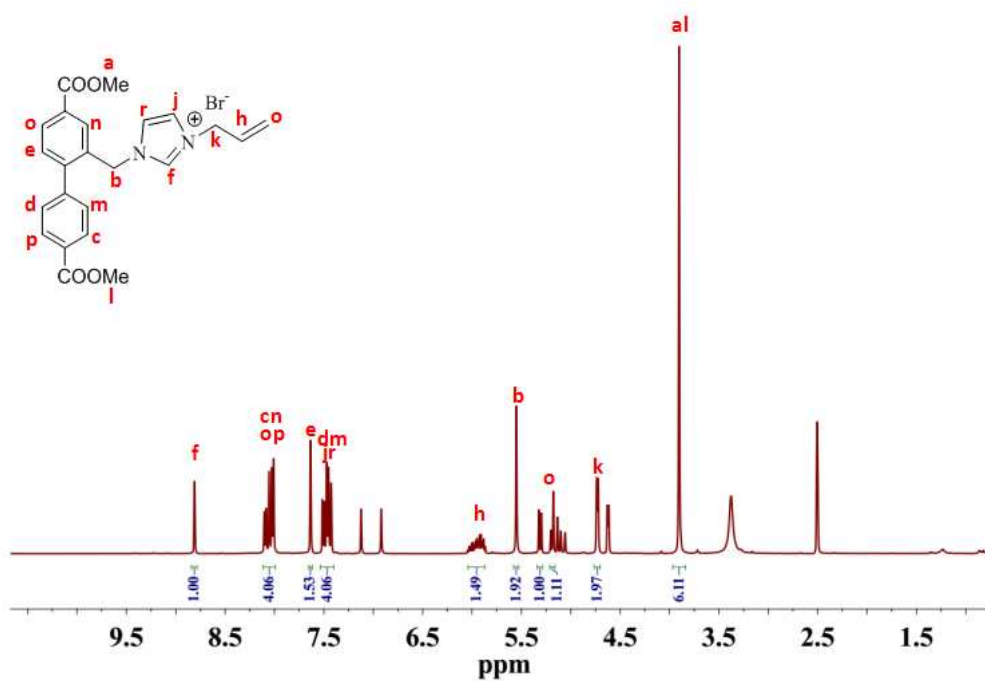

**Figure S7.** The <sup>1</sup>H-NMR spectrum of intermediate **C**.

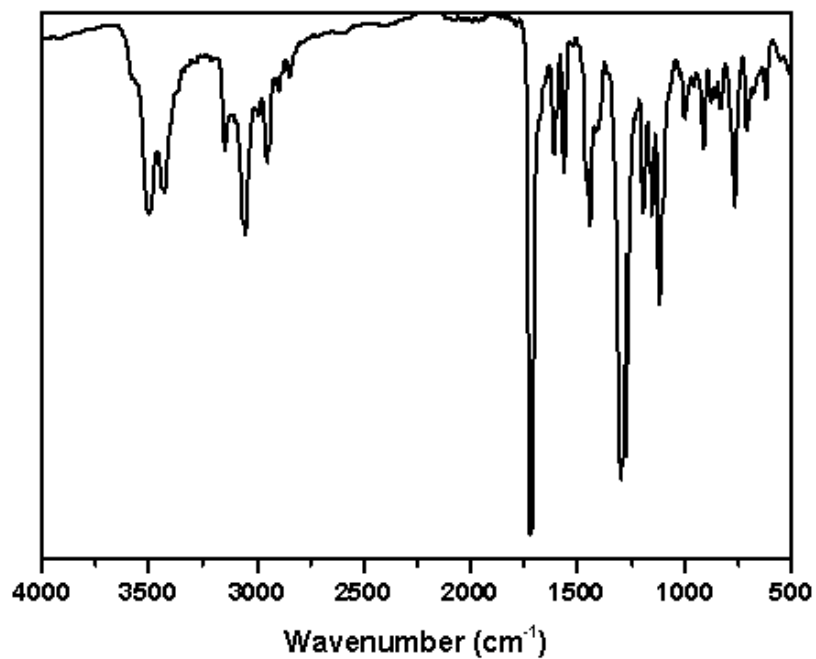

**Figure S8.** IR spectrum for intermediate **C**.

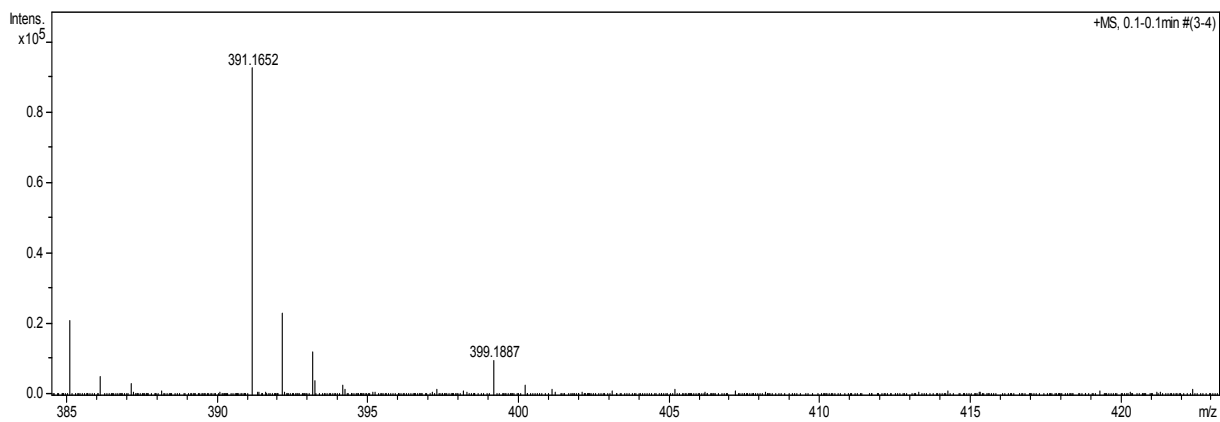

**Figure S9.** The mass spectrum (MS) of intermediate **C**.

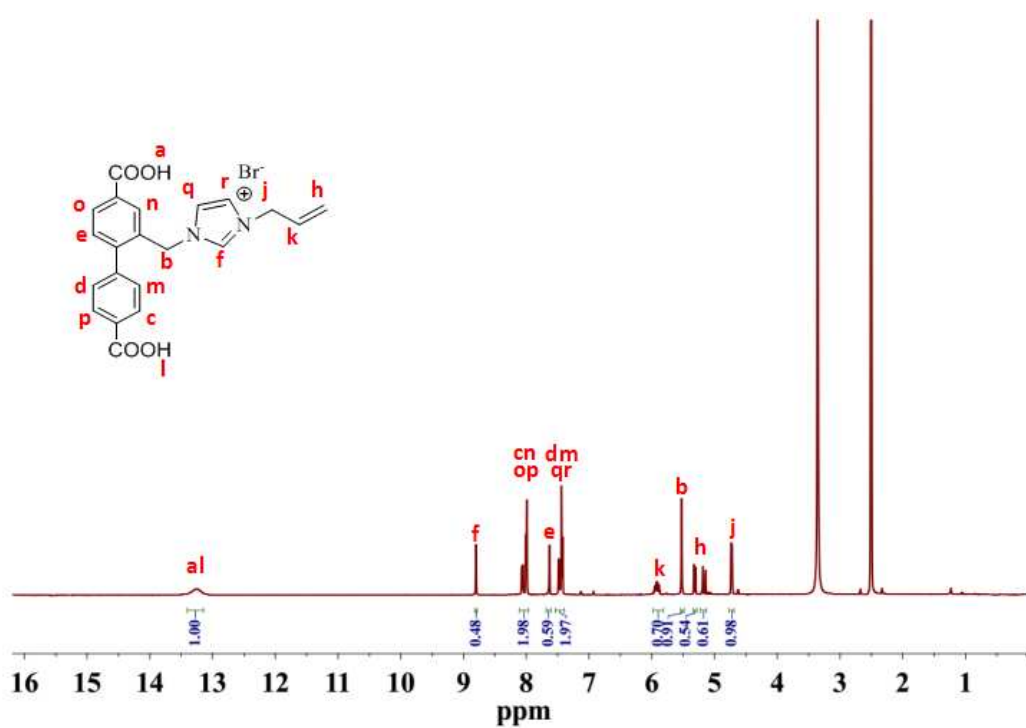

Figure S10. The <sup>1</sup>H-NMR spectrum of the imidazolium-based ligand L.

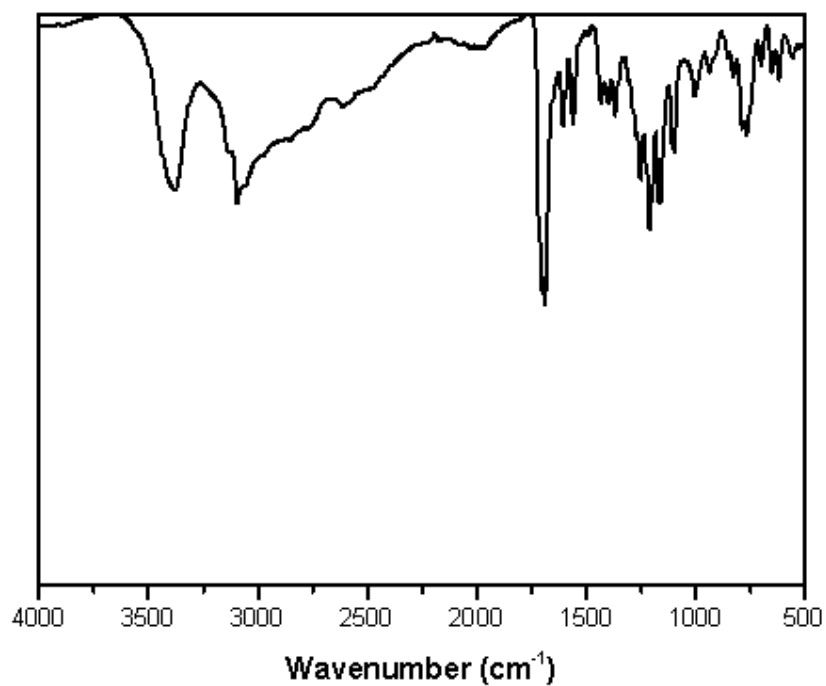

Figure S11. FTIR spectrum for the imidazolium-based ligand L.

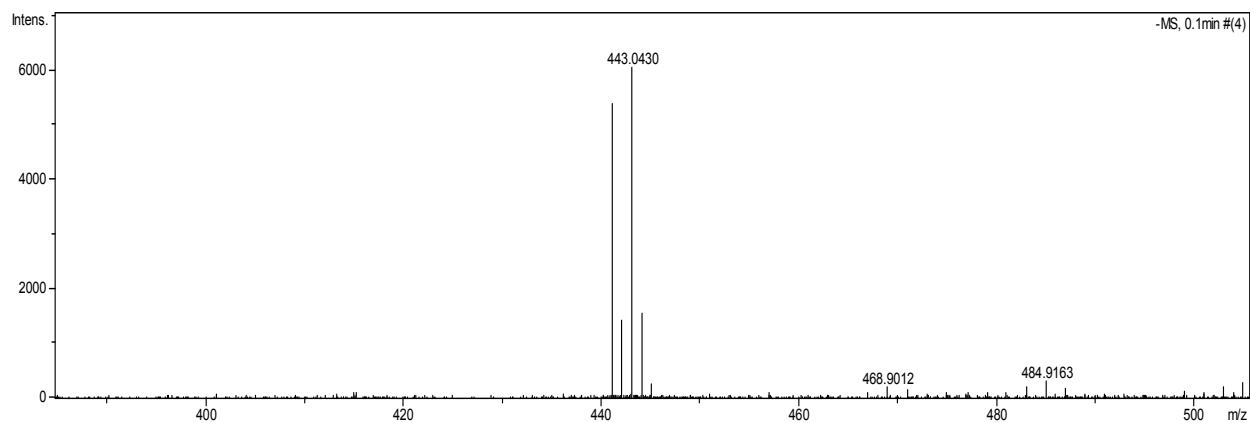

**Figure S12.** The mass spectrum (MS) of the imidazolium-based ligand L.

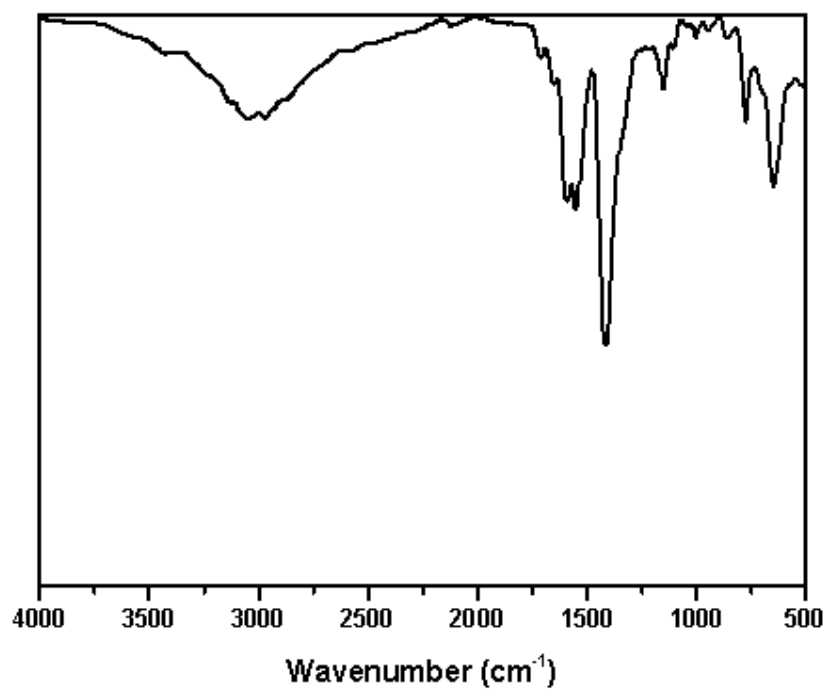

**Figure S13.** FTIR spectrum for UiO-67-IL, 1.



### 3. The $^1\text{H}$ NMR spectra for Catalytic $\text{CO}_2$ Cyclic Addition

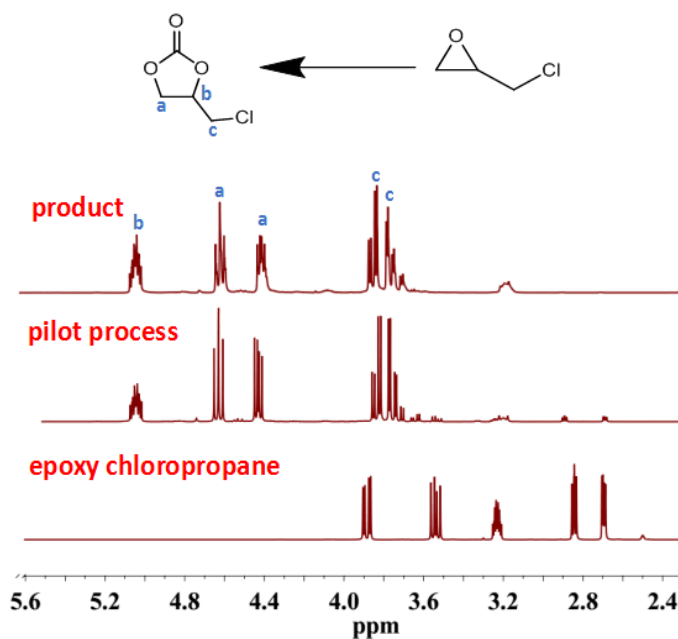

Figure S14. The  $^1\text{H}$ -NMR spectrum of the epichlorohydrin and catalytic product.

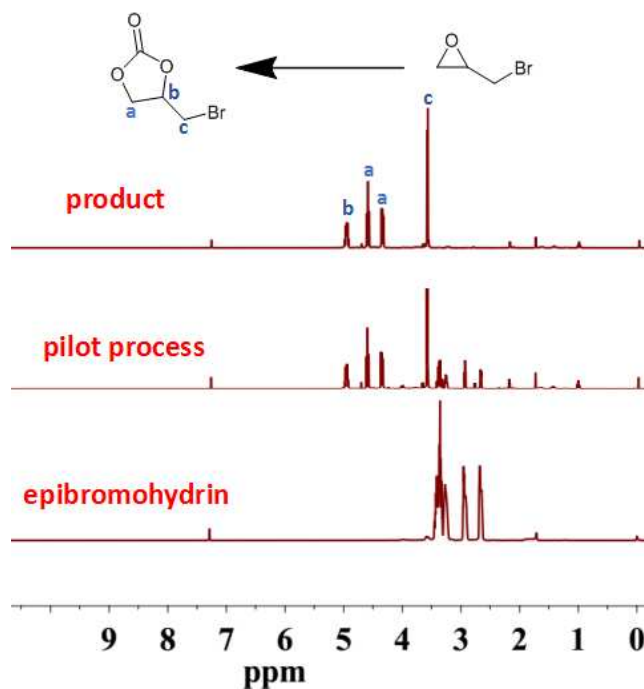

Figure S15. The  $^1\text{H}$ -NMR spectrum of the epoxy bromopropane and catalytic product.

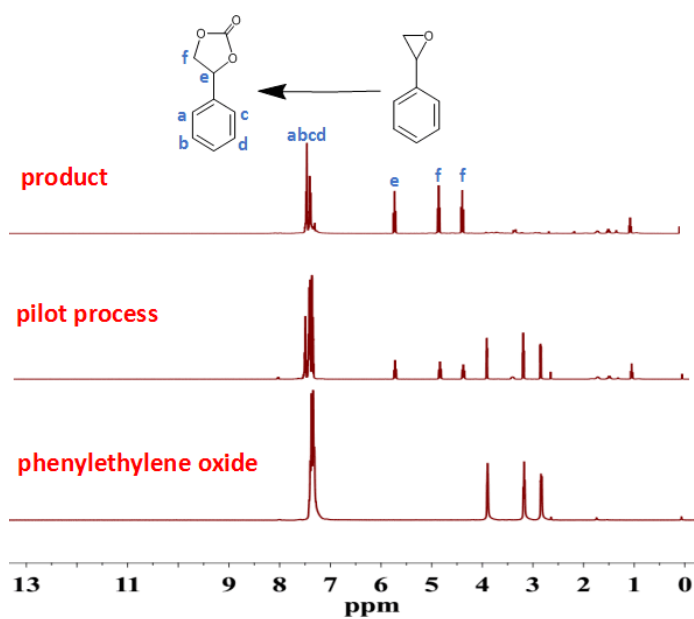

**Figure S16.** The  $^1\text{H}$ -NMR spectrum of the epoxy styrene and catalytic product.

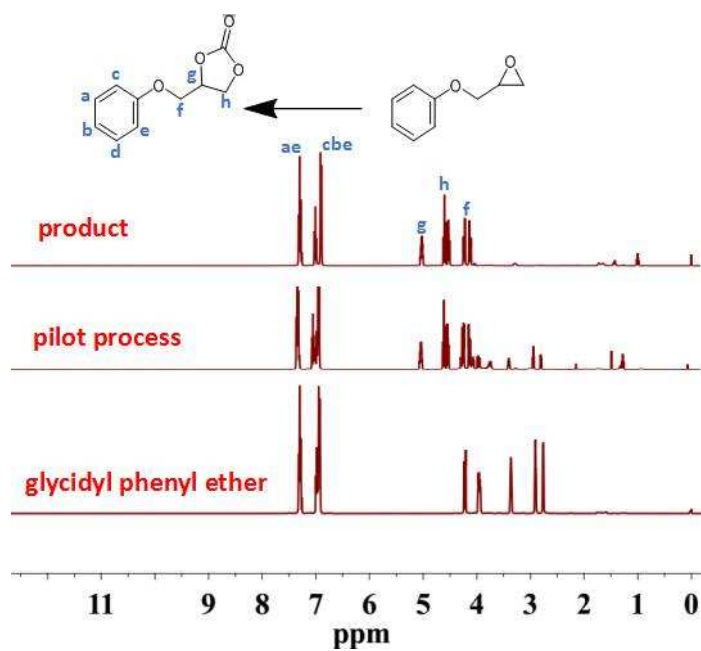

**Figure S17.** The  $^1\text{H}$ -NMR spectrum of the phenyl glycidyl ether and catalytic product.

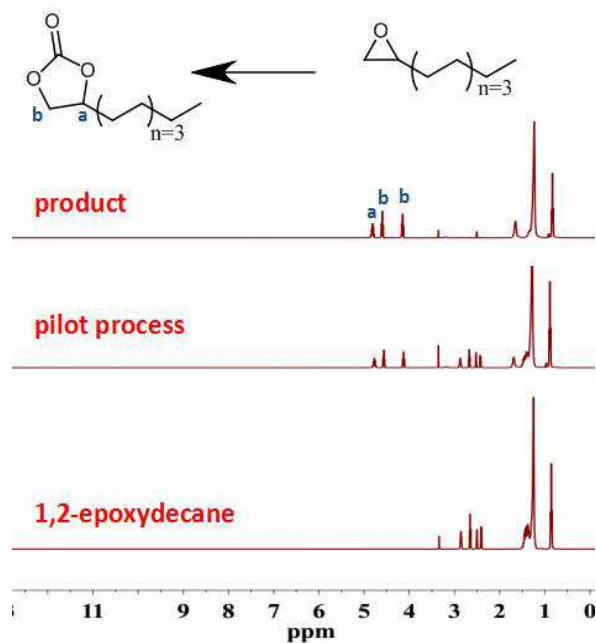

**Figure S18.** The  $^1\text{H}$ -NMR spectrum of the 1,2-epoxydecane and catalytic product.

#### 4. References

(1) Xydias, P.; Spanopoulos, I.; Klontzas, E.; Froudakis, G.E.; Trikalitis, P. N.; Drastic Enhancement of the  $\text{CO}_2$  Adsorption Properties in Sulfone Functionalized Zr- and Hf-UiO-67 MOFs with Hierarchical Mesopores. *Inorg. Chem.* **2014**, *53*, 679–681.
